# Supplementary material
Source: publisher site journal article supplement (https://www.dovepress.com/article/404167)
Supplement: Supplementary file 1 [file get_supplementary_file.php]

**Table S1.** Kappa coefficient for three readers, with n = 40 eyes

| Readers | γPPA | PPS | PICC |
| --- | --- | --- | --- |
| I-II (AE-YA) | 94,74% | 94,85% | 100% |
| I-III (AE-AD) | 94,85% | 89,77% | 100% |
| II-III (YA-AD) | 89,61% | 94,85% | 100% |

**Notes:** I to III: readers designations. There was good agreement between the graders. **Abbreviations:** γPPA:gamma peripapillary atrophy. PPS: peripapillary staphyloma. PICC: peripapillary intrachoroidal cavitation.
